# Supplementary material for: Differential Signature of the Microbiome and Neutrophils in the Oral Cavity of HIV-Infected Individuals
Source: PubMed Central journal article supplement (PMC8630784; doi:10.3389/fimmu.2021.780910), 2021-11-09
Supplement: DataSheet_1.pdf [file DataSheet_1.pdf]

**Supplementary Table 1.** HIV-infected study subject's demographics.

| Code  | CD4 absolute (cells/mm3) | Viral Load (copies/mL) | Sex    | Age   | Experiments performed                 |                        |
|-------|--------------------------|------------------------|--------|-------|---------------------------------------|------------------------|
| TH01  | 640                      | < 40                   | Female | 26-30 | Flowcytometry CD15                    |                        |
| TH02  | 590                      | < 40                   | Male   | 51-55 | Flowcytometry CD15                    | ELISA, Multiplex Elisa |
| TH04  | 880                      | < 40                   | Male   | 51-55 | Flowcytometry CD15                    |                        |
| TH05  | 730                      | < 40                   | Male   | 41-45 | Flowcytometry CD15                    |                        |
| TH06  | 740                      | < 40                   | Male   | 61-65 | Flowcytometry CD15                    | ELISA, Multiplex Elisa |
| TH09  | 560                      | < 40                   | Male   | 56-60 | Flowcytometry CD15                    |                        |
| TH10  | 870                      | < 40                   | Male   | 46-50 | Flowcytometry CD15                    |                        |
| TH11  | 800                      | < 40                   | Male   | 41-45 | Flowcytometry CD15                    |                        |
| TH12  | 650                      | < 40                   | Female | 41-45 | Flowcytometry CD15                    |                        |
| TH13  | 630                      | < 40                   | Male   | 61-65 | Flowcytometry CD15                    |                        |
| TH15  | 740                      | < 40                   | Female | 41-45 | Flowcytometry CD15                    | ELISA, Multiplex Elisa |
| TH16  | 550                      | < 40                   | Male   | 46-50 | Flowcytometry CD15                    | ELISA, Multiplex Elisa |
| TH17  | 710                      | < 40                   | Female | 31-35 | Flowcytometry CD15                    | ELISA, Multiplex Elisa |
| TH18  | 760                      | < 40                   | Male   | 36-40 | Flowcytometry CD15                    |                        |
| TH19  | 560                      | < 40                   | Female | 36-40 | Flowcytometry CD15                    |                        |
| TH20  | 570                      | < 40                   | Female | 36-40 | Flowcytometry CD15                    |                        |
| TH21  | 650                      | < 40                   | Male   | 41-45 | Flowcytometry CD15                    |                        |
| TH170 | 720                      | < 40                   | Male   | 36-40 | Flowcytometry CD15, Gal-9, CD44, CD32 |                        |
| TH173 | 340                      | 804                    | Male   | 31-35 | Flowcytometry CD15, Gal-9, CD44, CD32 |                        |
| TH175 | 354                      | < 40                   | Female | 36-40 | Flowcytometry CD15, Gal-9, CD44, CD32 |                        |
| TH177 | 651                      | < 40                   | Female | 18-25 | Flowcytometry CD15, Gal-9, CD44, CD32 | ELISA, Multiplex Elisa |
| TH178 | 590                      | < 40                   | Male   | 41-45 | Flowcytometry CD15, Gal-9, CD44, CD32 | ELISA, Multiplex Elisa |
| TH180 | 460                      | < 40                   | Male   | 46-50 | Flowcytometry CD15, Gal-9, CD44, CD32 | ELISA, Multiplex Elisa |
| TH182 | 302                      | 54                     | Female | 41-45 | Flowcytometry CD15, Gal-9, CD44, CD32 | ELISA, Multiplex Elisa |
| TH185 | 750                      | < 40                   | Male   | 41-45 | Flowcytometry CD15, Gal-9, CD44, CD32 | ELISA, Multiplex Elisa |
| TH186 | 590                      | < 40                   | Female | 46-50 | Flowcytometry CD15, Gal-9, CD44, CD32 | ELISA, Multiplex Elisa |
| TH187 | 920                      | < 40                   | Male   | 36-40 | Flowcytometry CD15, Gal-9, CD44, CD32 | ELISA, Multiplex Elisa |
| TH189 | 208                      | 314                    | Male   | 51-55 | Flowcytometry CD15, Gal-9, CD44, CD32 | ELISA, Multiplex Elisa |
| TH190 | 910                      | < 40                   | Female | 56-60 | Flowcytometry CD15, Gal-9, CD44, CD32 | ELISA, Multiplex Elisa |
| TH191 | 780                      | 51                     | Male   | 51-55 | Flowcytometry CD15, Gal-9, CD44, CD32 | ELISA, Multiplex Elisa |
| TH193 | 570                      | < 40                   | Female | 51-55 | Flowcytometry CD15, Gal-9, CD44, CD32 | ELISA, Multiplex Elisa |
| TH194 | 348                      | < 40                   | Male   | 66-70 | Flowcytometry CD15, Gal-9, CD44, CD32 | ELISA, Multiplex Elisa |
| TH196 | 1200                     | < 40                   | Male   | 61-65 | Flowcytometry CD15, Gal-9, CD44, CD32 | ELISA, Multiplex Elisa |
| TH197 | 402                      | < 40                   | Male   | 71-75 | Flowcytometry CD15, Gal-9, CD44, CD32 | ELISA, Multiplex Elisa |
| TH198 | 1464                     | < 40                   | Male   | 56-60 | Flowcytometry CD15, Gal-9, CD44, CD32 | ELISA, Multiplex Elisa |
| TH199 | 539                      | < 40                   | Male   | 18-25 | Flowcytometry CD15, Gal-9, CD44, CD32 | ELISA, Multiplex Elisa |
| TH201 | N/A                      | < 40                   | Male   | 26-30 | Flowcytometry CD15, Gal-9, CD44, CD32 | ELISA, Multiplex Elisa |
| TH202 | 539                      | < 40                   | Male   | 36-40 | Flowcytometry CD15, Gal-9, CD44, CD32 | ELISA, Multiplex Elisa |
| TH204 | 315                      | < 40                   | Male   | 41-45 | Flowcytometry CD15, Gal-9, CD44, CD32 | ELISA, Multiplex Elisa |
| TL01  | 140                      | < 40                   | Male   | 75+   | Flowcytometry CD15                    |                        |
| TL03  | 170                      | < 40                   | Male   | 56-60 | Flowcytometry CD15                    |                        |
| TL04  | 20                       | < 40                   | Male   | 41-45 | Flowcytometry CD15                    |                        |
| TL05  | 140                      | < 40                   | Female | 41-45 | Flowcytometry CD15                    |                        |
| TL07  | 100                      | < 40                   | Female | 56-60 | Flowcytometry CD15                    |                        |

|       |      |      |        |       |                                       |                        |
|-------|------|------|--------|-------|---------------------------------------|------------------------|
| TL08  | 40   | < 40 | Female | 36-40 | Flowcytometry CD15                    | ELISA, Multiplex Elisa |
| TL09  | 160  | < 40 | Male   | 56-60 | Flowcytometry CD15                    |                        |
| TL171 | 166  | < 40 | Female | 36-40 | Flowcytometry CD15, Gal-9, CD44, CD53 |                        |
| TL174 | 152  | < 40 | Male   | 51-55 | Flowcytometry CD15, Gal-9, CD44, CD54 |                        |
| TL179 | 161  | < 40 | Male   | 51-55 | Flowcytometry CD15, Gal-9, CD44, CD55 |                        |
| TL184 | 110  | < 40 | Male   | 51-55 | Flowcytometry CD15, Gal-9, CD44, CD56 |                        |
| L01   | 720  | < 40 | Male   | 61-65 | Flowcytometry CD15                    |                        |
| L02   | 250  | < 40 | Female | 41-45 | Flowcytometry CD15                    |                        |
| L04   | 570  | < 40 | Female | 41-45 | Flowcytometry CD15                    |                        |
| L05   | 1030 | < 40 | Female | 51-55 | Flowcytometry CD15                    |                        |
| L06   | 640  | < 40 | Female | 26-30 | Flowcytometry CD15                    |                        |
| L07   | 920  | < 40 | Male   | 31-35 | Flowcytometry CD15                    |                        |
| L08   | 560  | < 40 | Female | 36-40 | Flowcytometry CD15                    |                        |
| L09   | 700  | < 40 | Female | 36-40 | Flowcytometry CD15                    |                        |
| L10   | 970  | < 40 | Female | 41-45 | Flowcytometry CD15                    |                        |
| N01   | 230  | N/A  | Male   | 41-45 | Flowcytometry CD15                    |                        |
| N02   | 160  | N/A  | Male   | 56-60 | Flowcytometry CD15                    |                        |

TH=ART patients with high CD4 (>200 cells/mm<sup>3</sup>)

TL=ART patients with low CD4 (<=200 cells/mm<sup>3</sup>)

L= Long-Term non-Progressor,

N= Naive ART,

Samples in red were subjected to 16s Sequencing.

**Supplementary Table 2.** HIV-negative study subject's demographics.

| Code | Sex    | Age   | Experiment performed                  |                        |
|------|--------|-------|---------------------------------------|------------------------|
| HC1  | Male   | 26-30 | Flowcytometry CD15, Gal-9, CD44, CD32 |                        |
| HC2  | Male   | 26-30 | Flowcytometry CD15, Gal-9, CD44, CD32 |                        |
| HC3  | Female | 41-45 | Flowcytometry CD15, Gal-9, CD44, CD32 |                        |
| HC4  | Female | 41-45 | Flowcytometry CD15, Gal-9, CD44, CD32 |                        |
| HC5  | Male   | 18-25 | Flowcytometry CD15, Gal-9, CD44, CD32 |                        |
| HC6  | Female | 31-35 | Flowcytometry CD15, Gal-9, CD44, CD32 |                        |
| HC7  | Female | 56-60 | Flowcytometry CD15, Gal-9, CD44, CD32 |                        |
| HC8  | Female | 46-50 | Flowcytometry CD15, Gal-9, CD44, CD32 |                        |
| HC9  | Female | 18-25 | Flowcytometry CD15, Gal-9, CD44, CD32 |                        |
| HC10 | Female | 26-30 | Flowcytometry CD15, Gal-9, CD44, CD32 |                        |
| HC11 | Female | 18-25 | Flowcytometry CD15, Gal-9, CD44, CD32 |                        |
| HC12 | Female | 26-30 | Flowcytometry CD15, Gal-9, CD44, CD32 |                        |
| HC13 | Female | 26-30 |                                       | Elisa, Multiplex Elisa |
| HC14 | Female | 41-45 |                                       | Elisa, Multiplex Elisa |
| HC15 | Female | 36-40 |                                       | Elisa, Multiplex Elisa |
| HC16 | Male   | 31-35 |                                       | Elisa, Multiplex Elisa |
| HC17 | Female | 51-55 |                                       | Elisa, Multiplex Elisa |
| HC18 | Female | 18-25 |                                       | Elisa, Multiplex Elisa |
| HC19 | Male   | 18-25 |                                       | Elisa, Multiplex Elisa |
| HC20 | Male   | 18-25 |                                       | Elisa, Multiplex Elisa |
| HC21 | Female | 26-30 | Flowcytometry CD15, Gal-9, CD44, CD32 | Elisa, Multiplex Elisa |
| HC22 | Female | 26-30 | Flowcytometry CD15, Gal-9, CD44, CD32 | Elisa, Multiplex Elisa |
| HC23 | Female | 26-30 | Flowcytometry CD15, Gal-9, CD44, CD32 | Elisa, Multiplex Elisa |
| HC24 | Male   | 26-30 |                                       | Elisa, Multiplex Elisa |
| HC25 | Female | 51-55 |                                       | Elisa, Multiplex Elisa |
| HC26 | Female | 18-25 |                                       | Elisa, Multiplex Elisa |
| HC27 | Female | 18-25 | Flowcytometry CD15, Gal-9, CD44, CD32 | Elisa, Multiplex Elisa |
| HC28 | Female | 31-35 | Flowcytometry CD15, Gal-9, CD44, CD32 | Elisa, Multiplex Elisa |
| HC29 | Male   | 51-55 | Flowcytometry CD15, Gal-9, CD44, CD32 | Elisa, Multiplex Elisa |
| HC30 | Male   | 31-35 | Flowcytometry CD15, Gal-9, CD44, CD32 | Elisa, Multiplex Elisa |
| HC31 | Male   | 31-35 |                                       | Elisa, Multiplex Elisa |
| HC32 | Male   | 31-35 |                                       | Elisa, Multiplex Elisa |
| HC33 | Female | 18-25 | Flowcytometry CD15, Gal-9, CD44, CD32 |                        |
| HC34 | Male   | 18-25 | Flowcytometry CD15, Gal-9, CD44, CD32 |                        |
| HC35 | Female | 26-30 | Flowcytometry CD15                    |                        |
| HC36 | Male   | 46-50 | Flowcytometry CD15                    |                        |
| HC37 | Female | 36-40 | Flowcytometry CD15                    |                        |
| HC38 | Male   | 61-65 | Flowcytometry CD15                    |                        |
| HC39 | Male   | 41-45 | Flowcytometry CD15                    |                        |
| HC40 | Female | 41-45 | Flowcytometry CD15                    |                        |
| HC41 | Male   | 26-30 | Flowcytometry CD15                    |                        |
| HC42 | Female | 51-55 | Flowcytometry CD15                    |                        |
| HC43 | Female | 51-56 | Flowcytometry CD15                    |                        |

Samples in red were subjected to 16s Sequencing.

**Supplementary Table 3.** Demographic information and habits.

|                         |                                                  | HC (n=43) |     | HIV (n=61) |     |
|-------------------------|--------------------------------------------------|-----------|-----|------------|-----|
|                         |                                                  | Counts    | (%) | Counts     | (%) |
| Age                     | 18-30                                            | 21        | 49  | 5          | 8   |
|                         | 31-40                                            | 9         | 21  | 14         | 23  |
|                         | 41-50                                            | 6         | 14  | 19         | 31  |
|                         | 51-60                                            | 6         | 14  | 16         | 26  |
|                         | 61-75                                            | 1         | 2   | 6          | 10  |
|                         | 75+                                              | 0         | 0   | 1          | 2   |
| Sex                     | Male                                             | 16        | 37  | 37         | 61  |
|                         | Female                                           | 27        | 63  | 24         | 39  |
| Smokes                  | No                                               | 41        | 95  | 36         | 59  |
|                         | Light Smoker                                     | 2         | 5   | 16         | 26  |
|                         | Medium Smoker                                    | 0         | 0   | 4          | 7   |
|                         | Heavy Smoker                                     | 0         | 0   | 5          | 8   |
| Alcohol                 | Never                                            | 16        | 37  | 27         | 44  |
|                         | Daily                                            | 3         | 7   | 3          | 5   |
|                         | Weekly                                           | 9         | 21  | 13         | 21  |
|                         | Monthly                                          | 15        | 35  | 18         | 30  |
| Recreational substances | No use                                           | 41        | 95  | 43         | 70  |
|                         | Cannabis                                         | 2         | 5   | 12         | 20  |
|                         | Others (oxycodone, crack, cocaine, crystal meth) | 0         | 0   | 1          | 2   |
|                         | Cannabis+ others                                 | 0         | 0   | 5          | 8   |
| Medication              | Only ART                                         | 0         | 0   | 37         | 60  |
|                         | Antibiotics+ ART                                 | 0         | 0   | 6          | 10  |
|                         | Other                                            | 13        | 30  | 18         | 30  |
|                         | None                                             | 30        | 70  | 0          | 0   |
