# Supplementary material for: Differential Signature of the Microbiome and Neutrophils in the Oral Cavity of HIV-Infected Individuals
Source: PubMed Central journal article supplement (PMC8630784; doi:10.3389/fimmu.2021.780910), 2021-11-09

# Supplementary Figure 1

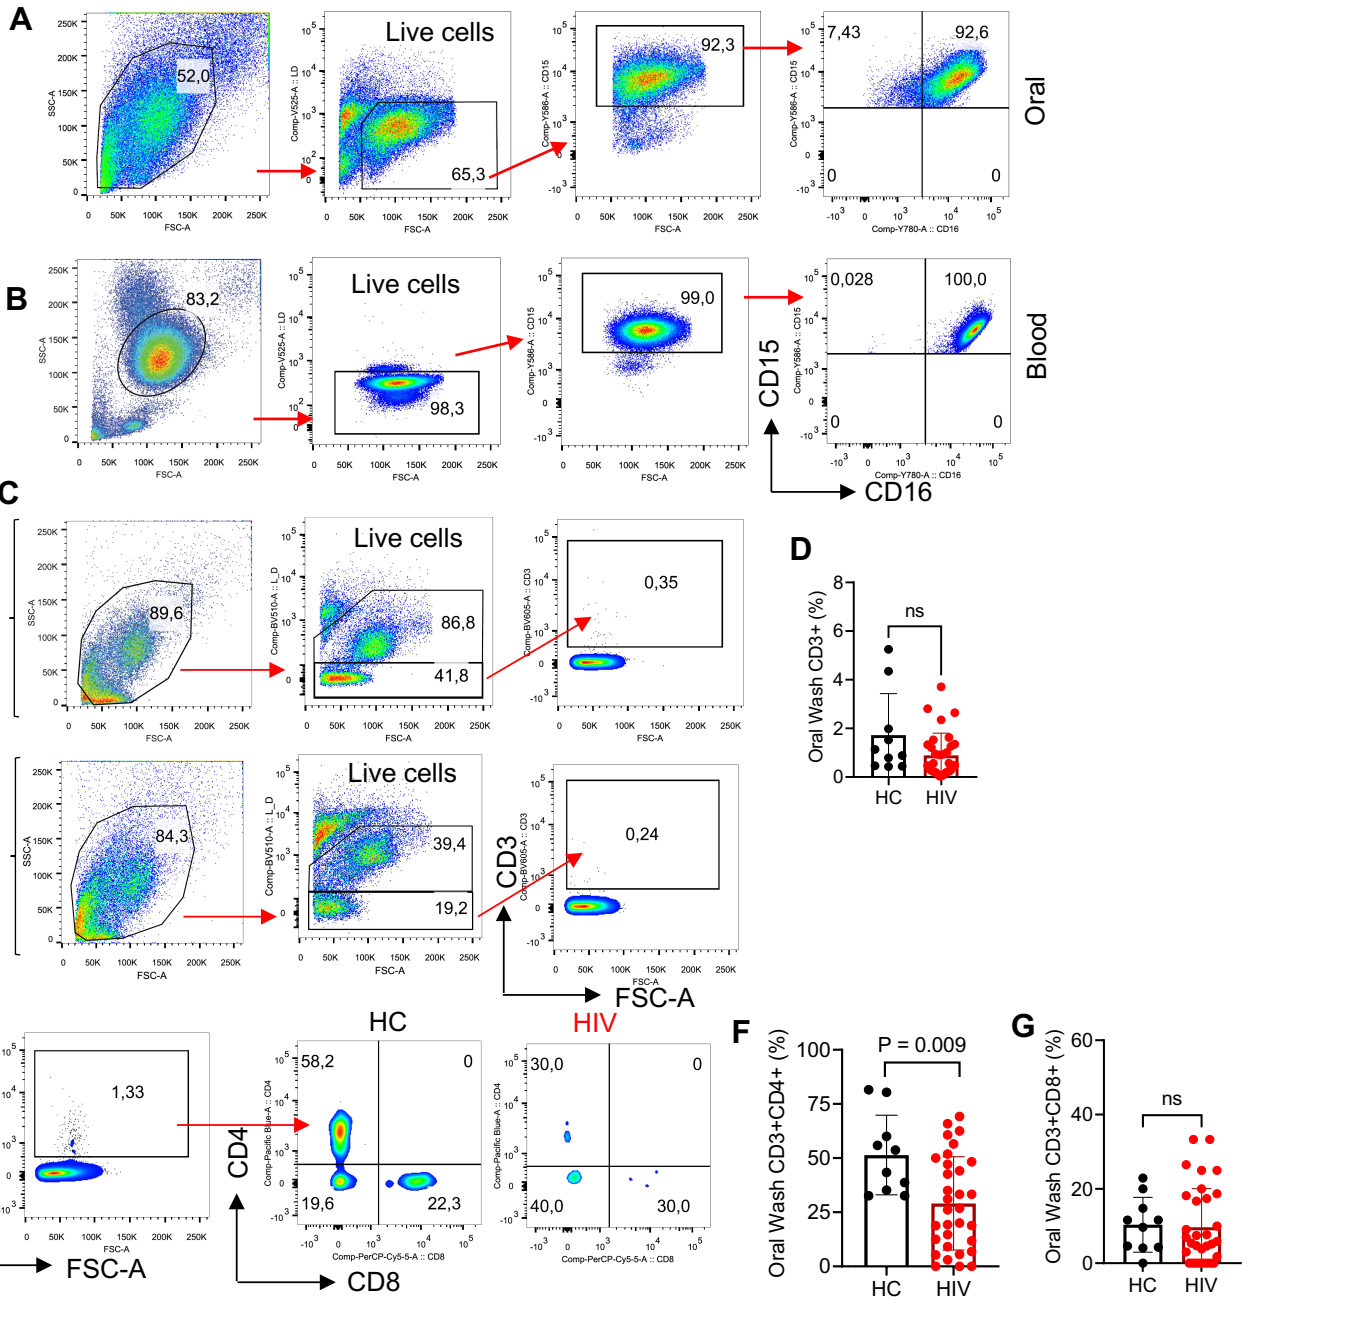

**S. Figure 1.** (A) Representative flow cytometry plots showing the gating strategy and the purity of oral neutrophils obtained from the oral wash. (B) Representative flow cytometry plots showing the gating strategy and the purity of blood neutrophils. (C) Representative gating strategy, and (D) cumulative data for CD3<sup>+</sup> T cells in the oral wash. (E) Representative plots, and (F) cumulative data for CD4<sup>+</sup>, and (G) CD8<sup>+</sup> T cells in the oral wash of HCs and HIV-infected individuals. (H) Cumulative data showing oral neutrophil migration in the presence of soluble Gal-9 (1.5 ng/ml), anti-CD44 antibody (20 μg/ml) or soluble Gal-9 (1.5 ng/ml) plus anti-CD44 antibody while all well were treated with fMLP (50 μm).

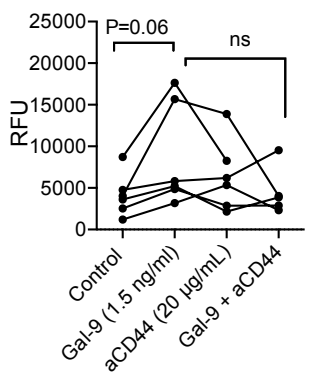

Supplement: DataSheet_2.pdf [file DataSheet_2.pdf]
